# Supplementary material for: Some Novel Cobalt Diphenylphosphine Complexes: Synthesis, Characterization, and Behavior in the Polymerization of 1,3-Butadiene
Source: MDPI journal article supplement (doi:10.3390/molecules26134067), 2021-07-02
Supplement: s1 [file s1]

Supplementary Information

# Some Novel Cobalt Diphenylphosphine Complexes: Synthesis, Characterization, and Behavior in the Polymerization of 1,3-Butadiene

Giovanni Ricci <sup>1,\*</sup>, Giuseppe Leone <sup>1</sup>, Giorgia Zanchin <sup>1</sup>, Benedetta Palucci <sup>1</sup>, Alessandra Forni <sup>1a</sup>, Anna Sommazzi <sup>2</sup>, Francesco Masi <sup>3</sup>, Stefano Zacchini <sup>4</sup>, Massimo Guelfi <sup>5</sup> and Guido Pampaloni <sup>5</sup>

<sup>1</sup> CNR- Istituto di Scienze e Tecnologie Chimiche “Giulio Natta” (SCITEC), Via Corti 12, I-20133 Milano, Italy; giuseppe.leone@scitec.cnr.it (G.L.); giorgia.zanchin@scitec.cnr.it (G.Z.); benedetta.palucci@scitec.cnr.it (B.P.)

<sup>1a</sup> CNR- Istituto di Scienze e Tecnologie Chimiche “Giulio Natta” (SCITEC), Via Golgi 19, I-20133 Milano, Italy; alessandra.forni@scitec.cnr.it

<sup>2</sup> Versalis S.p.A.–Centro Ricerca Novara, Via Fauser 4, I-28100 Novara, Italy; anna.sommazzi@versalis.eni.com

<sup>3</sup> Versalis S.p.A.–R&D Partner Catalysis, Piazza Boldrini 1, I-20097 San Donato Milanese (MI), Italy; francesco.masi@versalis.eni.com

<sup>4</sup> Dipartimento di Chimica Industriale “Toso Montanari”, Università di Bologna, Viale Risorgimento 4, I-40136 Bologna, Italy; stefano.zacchini@unibo.it

<sup>5</sup> Dipartimento di Chimica e Chimica Industriale, Università di Pisa, Via Moruzzi 13, I-56124 Pisa, Italy; massimo.guelfi@unipi.it (M.G.); guido.pampaloni@unipi.it (G.P.)

\* Correspondence: giovanni.ricci@scitec.cnr.it

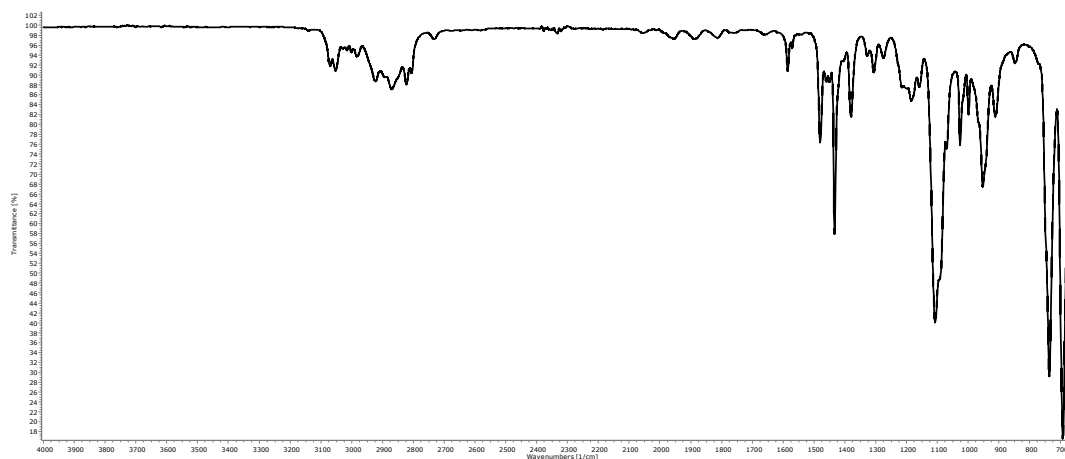

Figure S1. FT-IR spectrum of (2-methoxyethyl)diphenylphosphine.

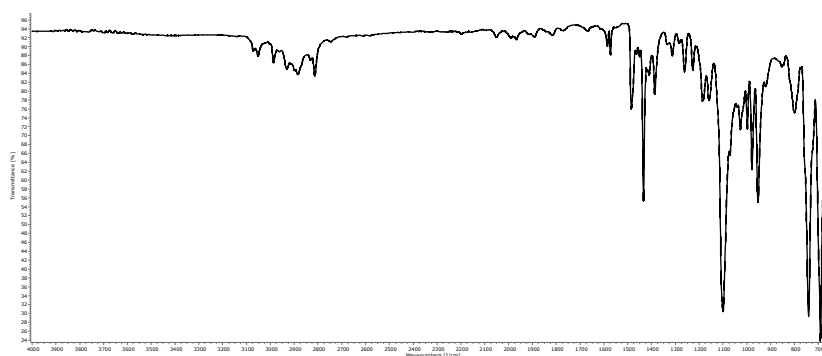

**Figure S1A.** FT-IR spectrum of [(2-methoxyethyl)diphenylphosphine]<sub>2</sub> cobalt dichloride (1).

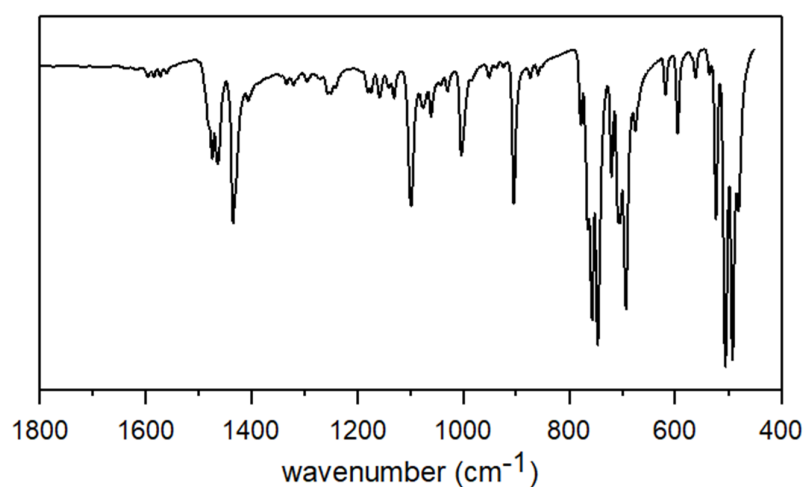

**Figure S2.** FT-IR spectrum of [(2-methoxyphenyl)diphenylphosphine]<sub>2</sub> cobalt dichloride (2).

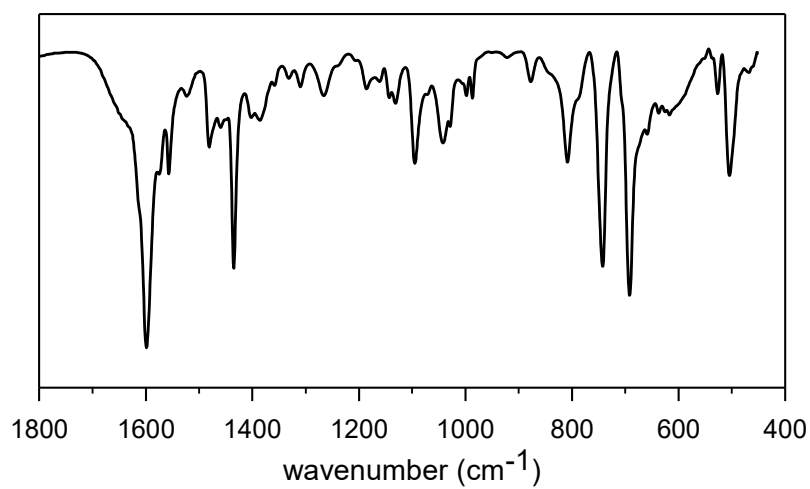

**Figure S3.** FT-IR spectrum of [2-(1,1-dimethylpropyl)-6-(diphenylphosphino)pyridine]<sub>2</sub> cobalt dichloride (3).

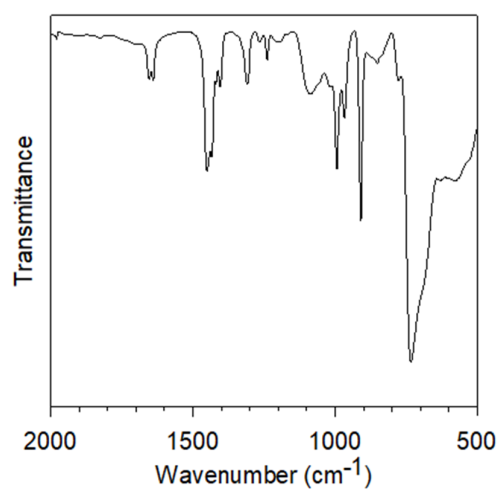

Figure S4. FT-IR spectrum of the polybutadiene of Table 3, run 1.

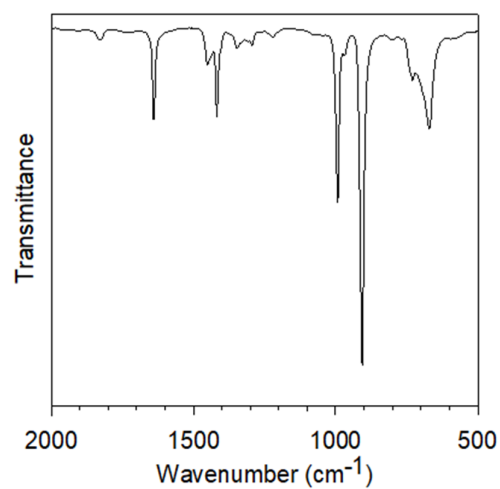

Figure S5. FT-IR spectrum of the polybutadiene of Table 3, run 2.

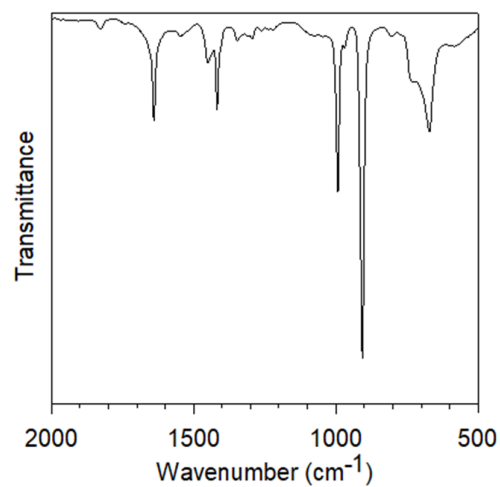

Figure S6. FT-IR spectrum of the polybutadiene of Table 3, run 3.

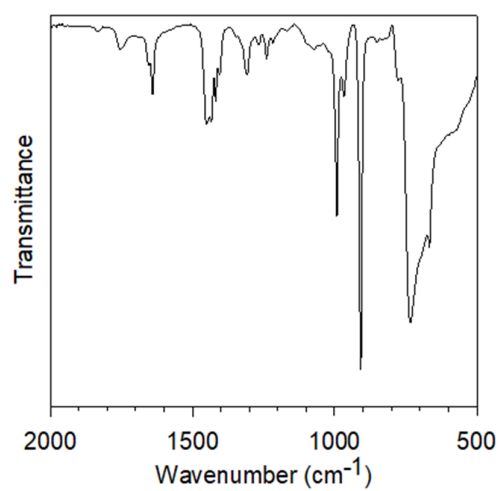

Figure S7. FT-IR spectrum of the polybutadiene of Table 3, run 4.

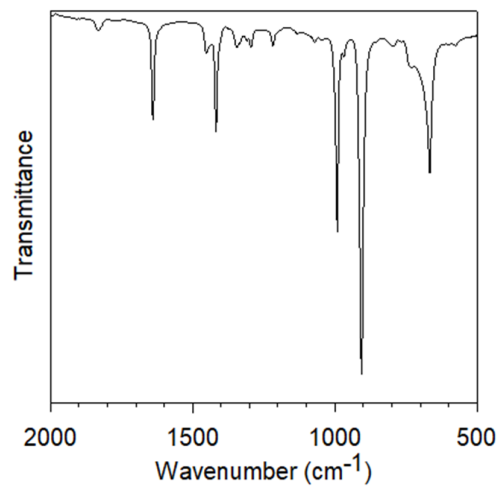

Figure S8. FT-IR spectrum of the polybutadiene of Table 3, run 5.

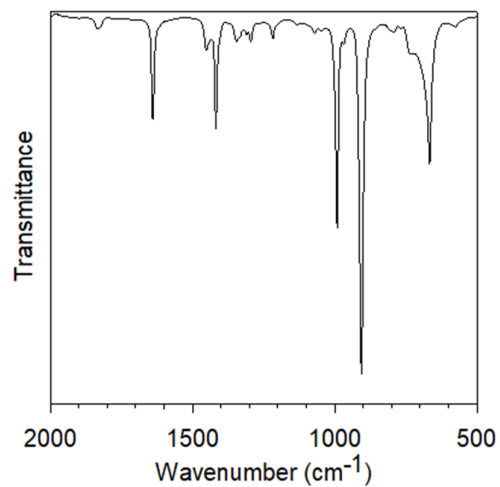

Figure S9. FT-IR spectrum of the polybutadiene of Table 3, run 6.

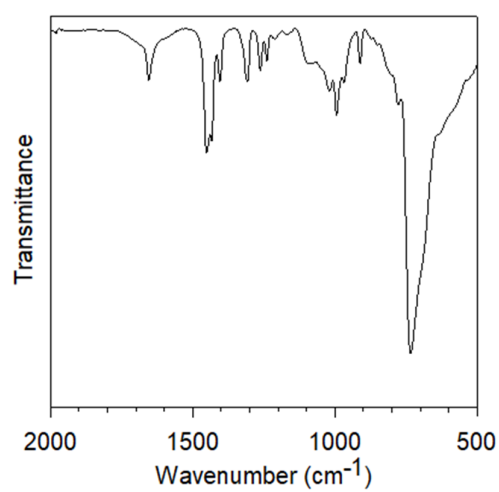

Figure S10. FT-IR spectrum of the polybutadiene of Table 3, run 7.

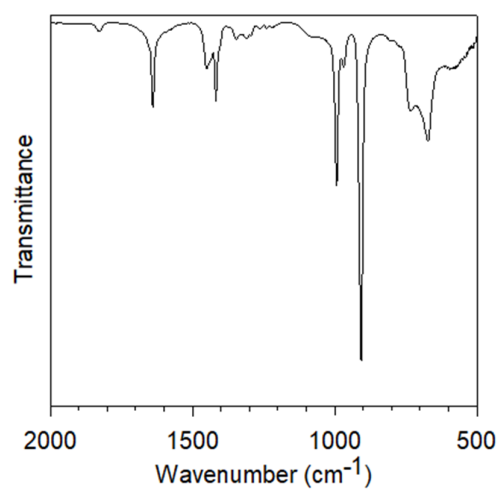

Figure S11. FT-IR spectrum of the polybutadiene of Table 3, run 8.

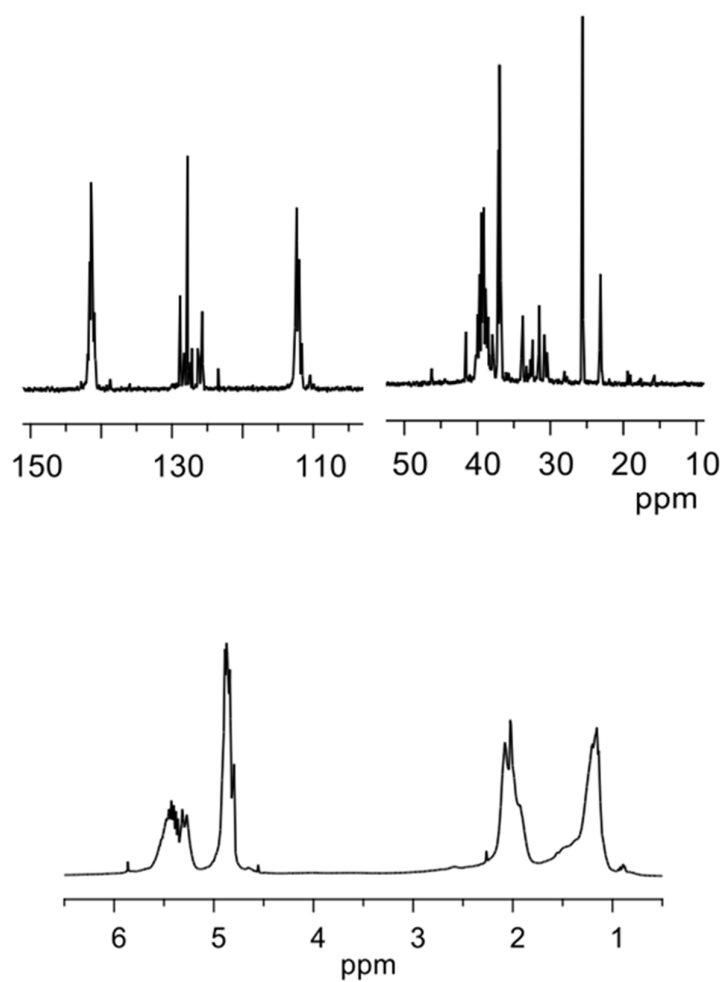

**Figure S12.** NMR spectra ( $^1\text{H}$  down,  $^{13}\text{C}$  up) of the polybutadiene of Table 3, run 2.

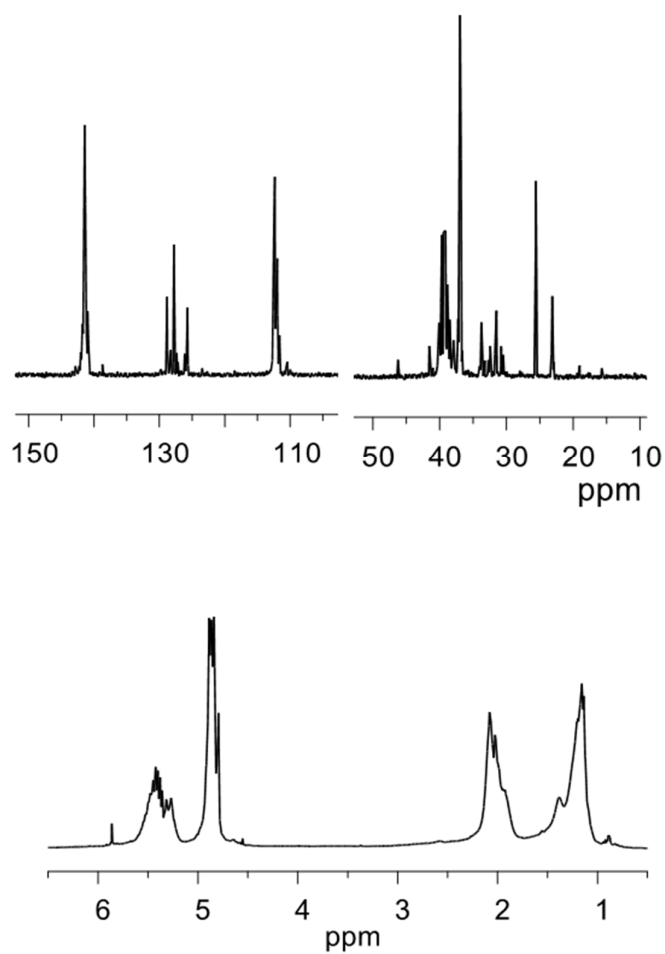

**Figure S13.** NMR spectra ( $^1\text{H}$  down,  $^{13}\text{C}$  up) of the polybutadiene of Table 3, run 3.

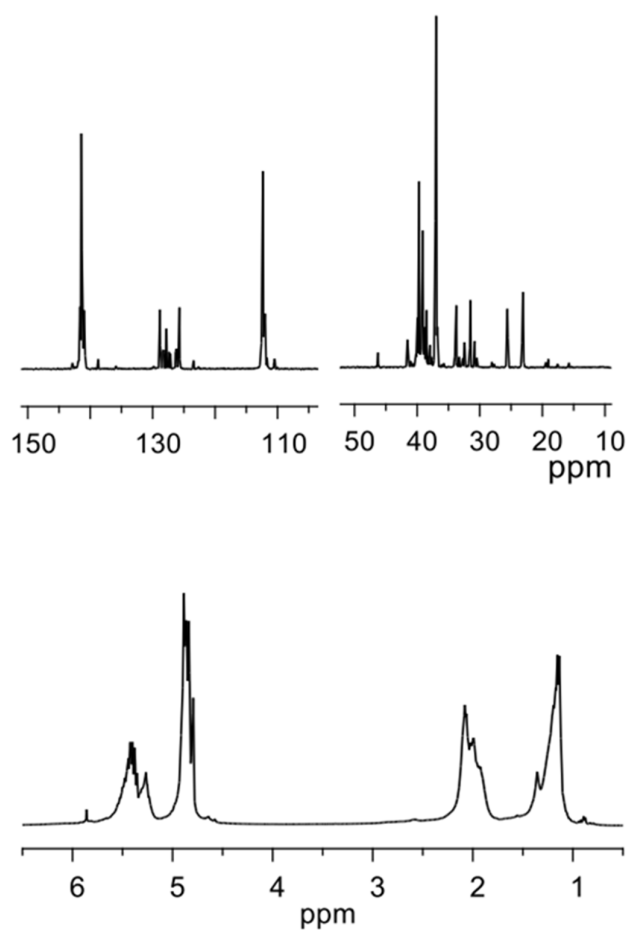

**Figure S14.** NMR spectra ( $^1\text{H}$  down,  $^{13}\text{C}$  up) of the polybutadiene of Table 3, run 5.



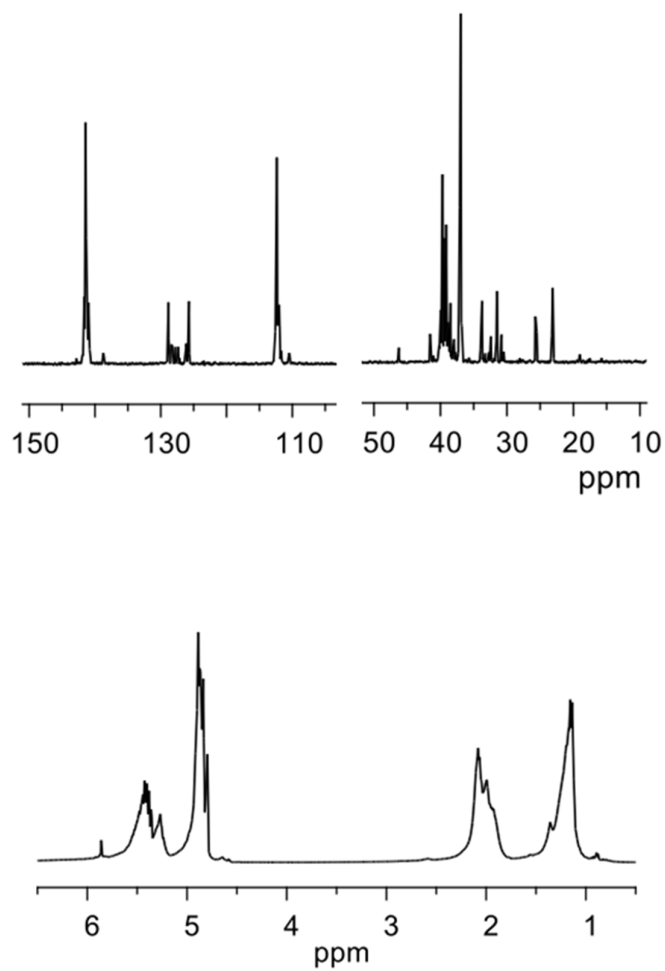

Figure S15. NMR spectra ( $^1\text{H}$  down,  $^{13}\text{C}$  up) of the polybutadiene of Table 3, run 6.

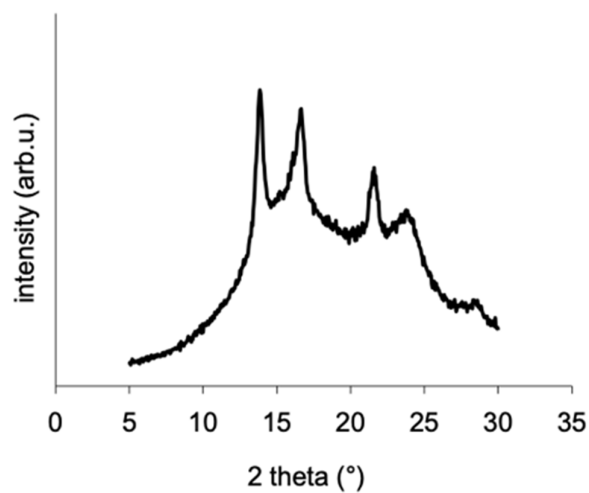

Figure S16. XRD spectrum of the polybutadiene of Table 3, run 5.

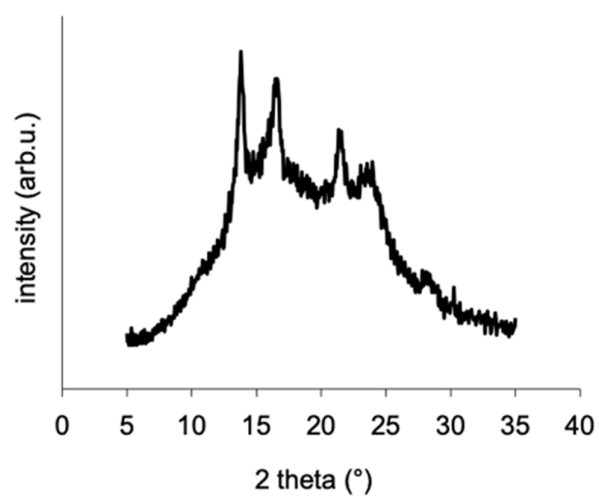

**Figure S17.** XRD spectrum of the polybutadiene of Table 3, run 6.
